# Supplementary figures and images for: Association between Gut Microbiota and Breast Cancer: Diet as a Potential Modulating Factor
Source: MDPI journal article supplement (doi:10.3390/nu15214628), 2023-10-31

**Supplemental Figure S1. Sample Size Flow Chart**

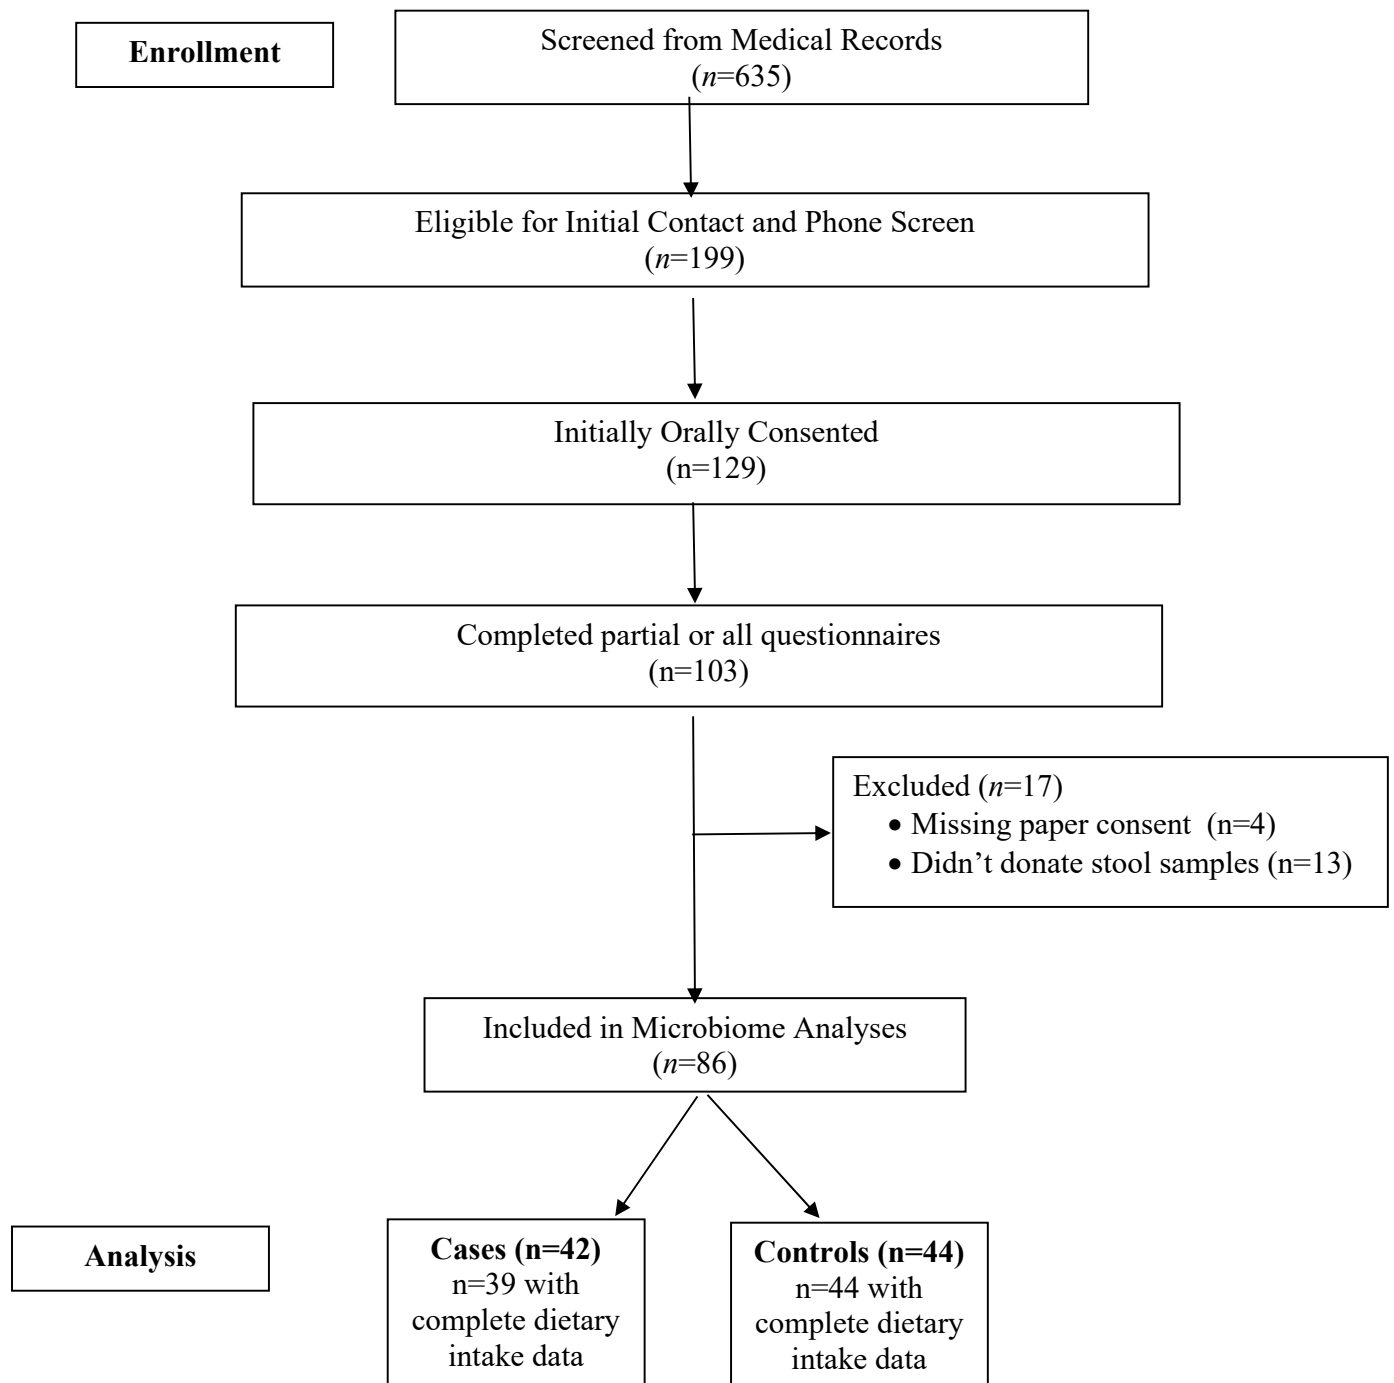

Supplement: s1 [file s1]
